# Supplementary material
Source: publisher figshare collection journal article supplement (https://geolsoc.figshare.com/ndownloader/files/13612232)
Supplement: Supplementary file 1 [file 13612232]

## Sheet: Sheet1
Table S1. Major oxide concents in orthopyroxene and clinopyroxene from peridotite core samples in the Luobusa ophiolite
Sample	Lithology	Mineral	SiO2	TiO2	Al2O3	FeOT	MnO	MgO	CaO	Na2O	K2O	NiO	Cr2O3	Total	Mg#
The LBSD-1 borehole
B98	Hz	Opx	55.8	0.027	3.533	6.114	0.142	32.817	0.601	0.003	0.005	0.079	0.674	99.875	90.537
		Cpx	52.623	0.102	3.294	2.049	0.083	16.345	24.48	0.087	0	0.049	0.841	99.925	93.434
B106	Hz	Opx	56.231	0.026	2.959	6.059	0.122	32.851	0.703	0.003	0.004	0.07	0.56	99.588	90.623
		Cpx	52.654	0.076	3.198	2.144	0.075	16.356	24.167	0.055	0.002	0.063	0.947	99.705	93.244
B143	Hz	Opx	56.172	0.021	3.313	5.974	0.115	32.84	0.692	0.003	0.004	0.049	0.587	99.77	90.741
		Cpx	53.083	0.088	3.505	2.09	0.052	16.398	23.274	0.315	0.006	0.074	0.911	99.794	93.321
B153	Hz	Opx	55.193	0.042	3.836	6.169	0.157	32.442	0.989	0.005	0.002	0.073	0.62	99.526	90.361
		Cpx	52.052	0.136	3.852	2.137	0.071	16.172	24.004	0.161	0.006	0.026	0.892	99.549	93.098
B169	Hz	Opx	55.464	0.049	3.608	5.951	0.106	32.58	0.778	0.006	0.004	0.066	0.573	99.184	90.71
		Cpx	52.06	0.133	3.648	2.136	0.066	16.514	23.541	0.117	0.005	0.051	0.858	99.127	93.248
B180	Hz	Opx	55.3645	0.0435	3.5945	6.54413	0.092	33.2359	0.523625	0.00325	0.00725	0.053375	0.280125	99.767	90.0526
		Cpx	53.07	0.146571	3.544	1.823	0.0514286	16.26	24.202	0.0822857	0	0.0191429	0.390857	99.5971	94.0807
B186	Hz	Opx	55.9158	0.0116	2.9802	6.14	0.0996	33.015	0.4976	0.0004	0.006	0.0968	0.701	99.4642	90.5507
		Cpx	52.8442	0.068	3.1012	2.0802	0.0556	16.2332	24.0894	0.1526	0.0024	0.065	0.9174	99.6098	93.2907
B199	Hz	Opx	55.6676	0.0222	3.6192	6.168	0.0862	32.374	0.838	0.0024	0.006	0.065	0.6516	99.5008	90.3476
		Cpx	52.2652	0.1002	3.7222	2.1676	0.0534	16.1122	24.238	0.1426	0.0076	0.0418	0.9178	99.7694	92.9749
B245	Hz	Opx	55.774	0.036	3.438	5.923	0.106	32.695	0.951	0.006	0.001	0.069	0.565	99.565	90.774
		Cpx	52.767	0.09	3.685	2.154	0.072	16.533	22.873	0.281	0.004	0.061	0.917	99.436	93.236
B256	Dun	Opx	57.783	0.026	0.677	5.734	0.124	34.157	0.919	0.001	0.004	0.045	0.306	99.777	91.393
		Cpx	54.753	0.035	0.615	1.717	0.07	17.762	24.473	0.05	0.004	0.025	0.433	99.935	94.858
B281	Hz	Opx	54.924	0.0106	3.8062	6.4256	0.1046	32.6698	0.4666	0	0.0026	0.0894	0.597	99.0964	90.0635
		Cpx	51.8896	0.106	4.2612	2.2542	0.078	15.9096	23.5724	0.2292	0.0026	0.0416	0.9242	99.2688	92.6325
B329	Hz	Opx	55.771	0.0862	3.1032	6.0096	0.1034	32.1556	1.1146	0.005	0.0016	0.1096	0.7706	99.2312	90.5088
		Cpx	52.4196	0.1626	3.3766	2.0002	0.0596	16.0322	23.9514	0.2986	0.0028	0.0712	1.1294	99.5044	93.4582
The LBSD-2 borehole
B120	Hz	Opx	55.2987	0.0165	3.81425	6.18675	0.09775	32.5028	0.75575	0	0.00325	0.092	0.63775	99.387	90.4
		Cpx	52.0832	0.1372	4.2378	2.4294	0.0642	17.5124	21.5842	0.1142	0.0002	0.0556	0.9836	99.2018	92.8251
B137	Hz	Opx	55.3499	0.0408571	3.77029	6.37029	0.0918571	33.6399	0.443	0.0164286	0.00642857	0.0565714	0.340571	100.13	90.3955
		Cpx	53.495	0.0982857	3.08229	1.93329	0.0485714	16.474	24.1379	0.0361429	0	0.0358571	0.363143	99.7163	93.8222
B155	Dun	Opx	56.5108	0.0152	1.8256	5.117	0.0872	33.2742	0.9272	0.0004	0.0064	0.0694	0.489	98.3224	92.1638
		Cpx	53.9182	0.047	1.742	1.8646	0.0514	16.9104	24.4164	0.0808	0	0.0406	0.684	99.7546	94.1742
B196	Hz	Opx	54.9784	0.067	4.242	6.3722	0.0986	32.2056	0.7848	0.0034	0.0052	0.0908	0.6252	99.4736	90.009
		Cpx	51.6926	0.105	4.5518	2.3846	0.0606	16.2088	23.1114	0.1612	0.0006	0.044	0.999	99.3184	92.3604
B226	Hz	Opx	55.4986	0.0242	3.8752	6.3122	0.105	32.596	0.5212	0.0024	0.0006	0.0718	0.6172	99.6244	90.198
		Cpx	52.198	0.1712	3.8016	2.0654	0.063	16.0182	24.1546	0.1544	0.0016	0.0254	0.8032	99.4562	93.2568
B269	Dun	Cpx	54.4194	0.074	1.1574	1.608	0.0498	17.2328	24.3826	0.177	0.0016	0.0546	0.637	99.7946	95.0276
B368	Hz	Opx	55.0912	0.0464	4.028	6.4928	0.108	32.0968	0.8012	0.0048	0.006	0.0586	0.606	99.3408	89.8052
		Cpx	51.1062	0.1342	4.7414	2.3544	0.0572	16.1796	23.7906	0.1532	0.0048	0.0384	0.979	99.5394	92.4779
Abbreviations: Hz: harzburgite; Dun: dunite; FeOT: total Fe in FeO.
